# Supplementary material for: Thickness-tunable core–shell Co@Pt nanoparticles encapsulated in sandwich-like carbon sheets as an enhanced electrocatalyst for the oxygen reduction reaction
Source: Royal Society of Chemistry journal article supplement (doi:10.1039/c8ta05114c), 2018-01-01
Supplement: c8ta05114c1.pdf [file c8ta05114c1.pdf]

Supporting Information:

**Thickness-tunable Core-shell Co@Pt Nanoparticles Encapsulated in Sandwich-like Carbon  
Sheets as Enhanced Electrocatalyst for Oxygen Reduction Reaction**

*Tao Xiang<sup>1</sup>, Ling Fang<sup>1</sup>, Jing Wan<sup>2</sup>, Li Liu<sup>1</sup>, Jiao Jiao Gao<sup>1</sup>, Hai Tao Xu<sup>1</sup>, Hui Juan Zhang<sup>1</sup>, Xiao Gu<sup>2</sup> and Yu*

*Wang\**

<sup>1</sup>The State Key Laboratory of Power Transmission Equipment and System Security

<sup>2</sup>Department of Applied Physics, Chongqing University, 174 Shazheng Street, Shapingba District,

Chongqing City, 400044, P.R. China.

\*E-mail: wangy@cqu.edu.cn

**Table S1.** Compositions of sandwiched-like Co@Pt/C-1, Co@Pt/C-2 and Co@Pt/C-3 core-shell catalysts, determined by ICP-AES.

| Composites | Experimental (ICP-AES) Co/Pt ratio |
|------------|------------------------------------|
| Co@Pt/C-1  | 90.22/9.78                         |
| Co@Pt/C-2  | 86.29/13.71                        |
| Co@Pt/C-3  | 84.34/15.66                        |

**Table S2.** ORR activity data of Co@Pt core-shell structure or Pt<sub>x</sub>Co<sub>y</sub> alloy NPs from the previous

literatures.

| sample                              | Mass activity (A/mg <sub>Pt</sub> ) | Specific activity (mA/cm <sup>2</sup> ) | ref          |
|-------------------------------------|-------------------------------------|-----------------------------------------|--------------|
| Sandwich-like<br>Co@Pt/C core-shell | 1.77                                | 1.21                                    | This<br>work |
| Co@Pt core-shell                    | 0.072                               | 0.145                                   | 1            |
| Core-shell-like Pt <sub>3</sub> Co  |                                     | 0.14                                    | 2            |
| Pt-coated Co<br>nanowires           | 0.793                               | 2.725                                   | 3            |
| Co@Pt/C core-shell                  | 0.05                                |                                         | 4            |
| Co@Pt core-shell                    | 0.17                                | 0.41                                    | 5            |
| PtCoN/C                             | 0.63                                | 0.7                                     | 6            |
| CNC Pt-Co/rGO                       |                                     | 1.14                                    | 7            |
| PtCo nanowires                      | 0.2                                 | 1.6                                     | 8            |
| Pt <sub>3</sub> Co/C                | 0.15                                | 0.18                                    | 9            |

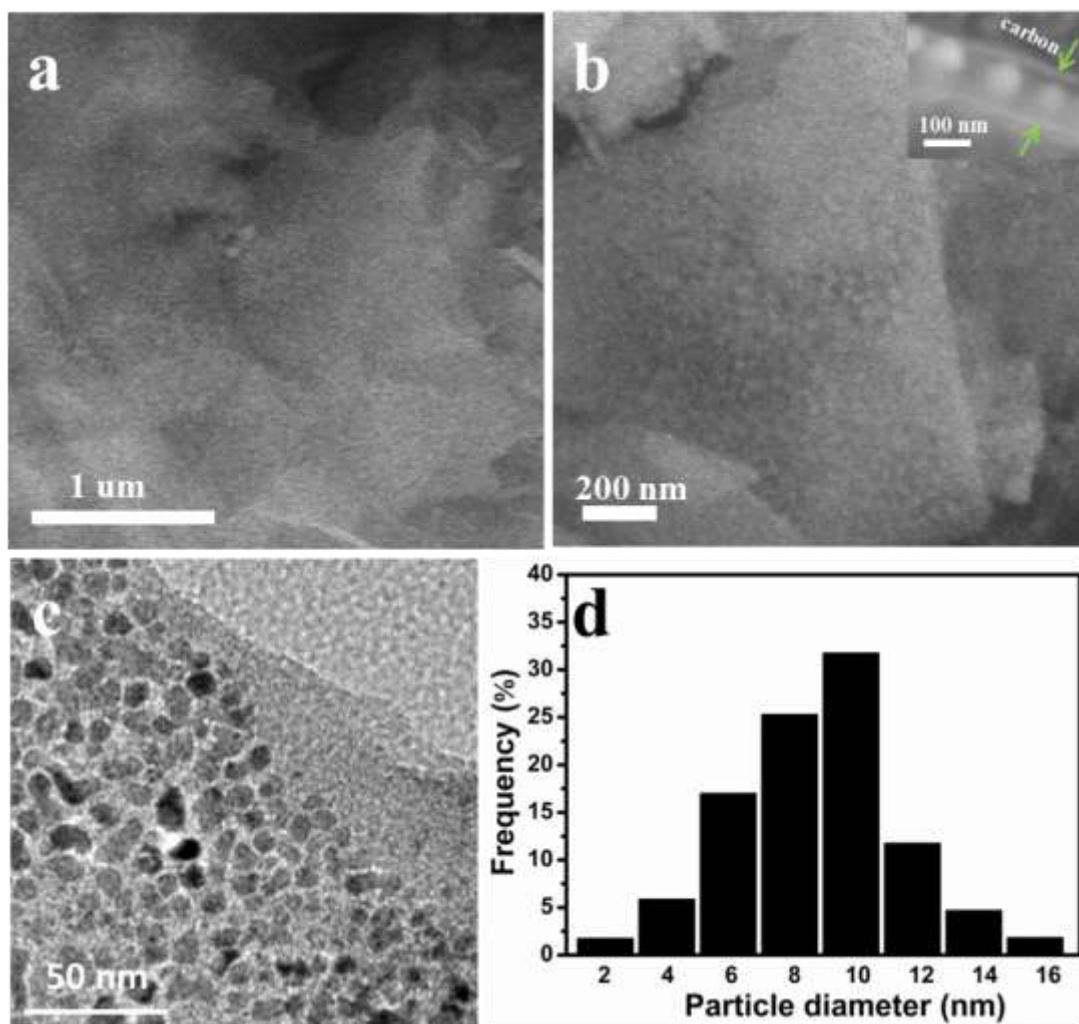

**Figure S1.** (a) (b) SEM images, (c) TEM image and (d) particle-size distribution of the sandwich-like Co/C NPs.

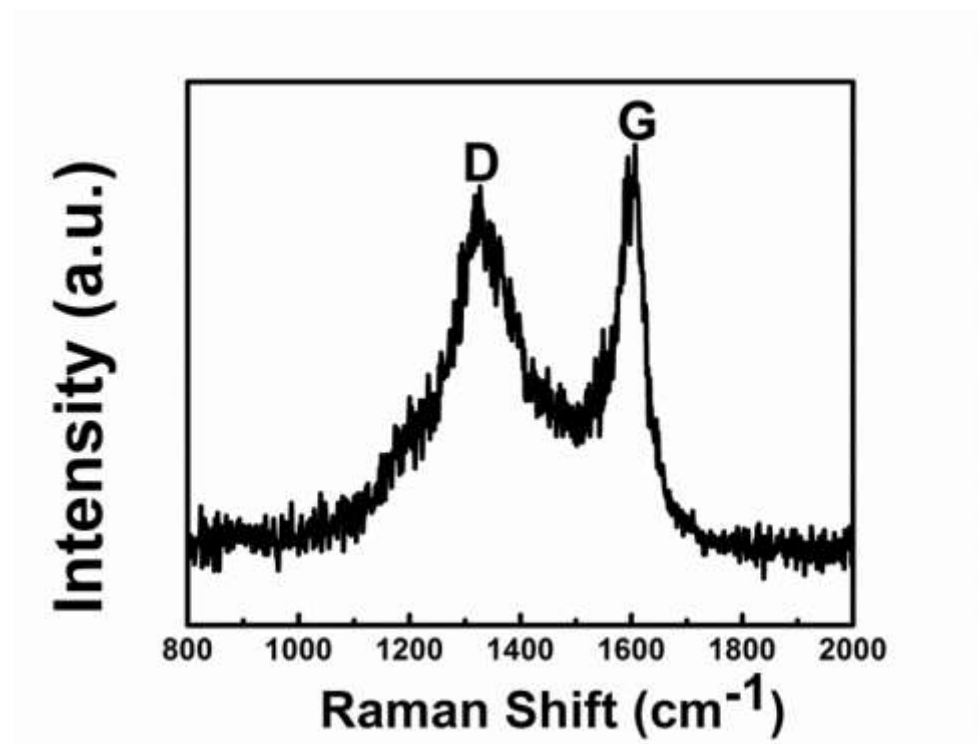

**Figure S2.** Raman spectrum to disclose the graphitization of sandwich-like Co@Pt/C-2 core-shell catalyst, implying the presence of well-graphitized carbon.

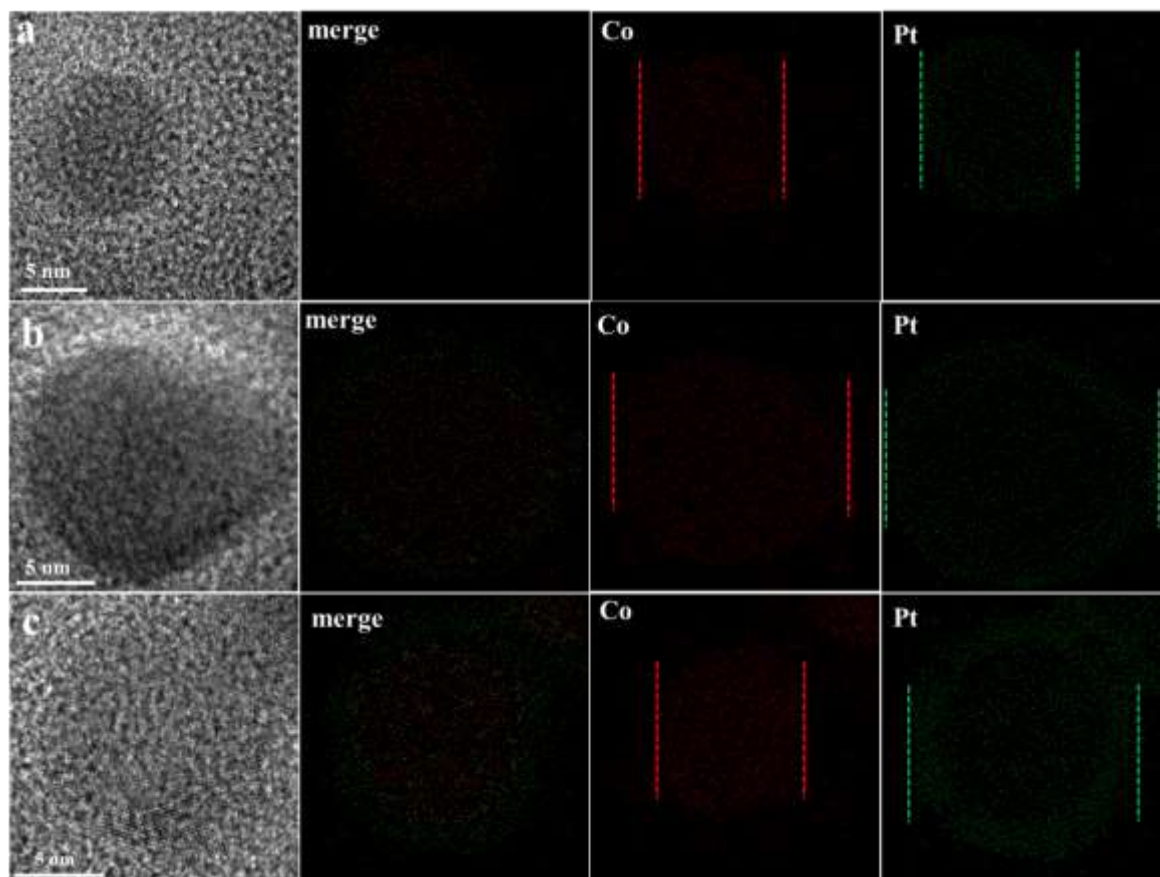

**Figure S3.** The HRTEM images and EDS elemental mappings of Co, Pt obtained for the single sandwich-like core-shell Co@Pt/C-1 (a), Co@Pt/C-2 (b) and Co@Pt/C-3 (c) catalysts.

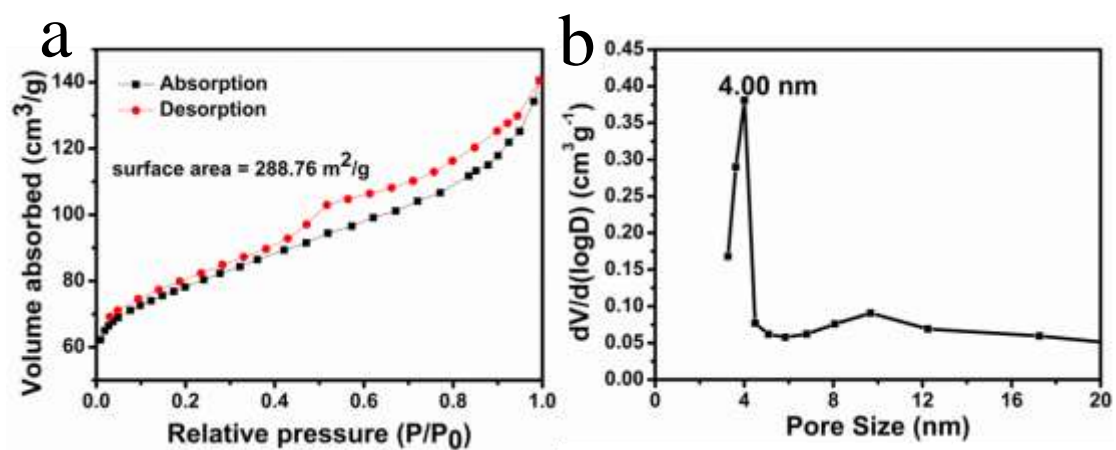

**Figure S4.** Nitrogen adsorption-desorption isotherm of the specific sandwiched structure to reveal the specific surface area (a) and corresponding pore size distribution (b) of sandwich-like Co@Pt/C-2 core-shell catalyst.

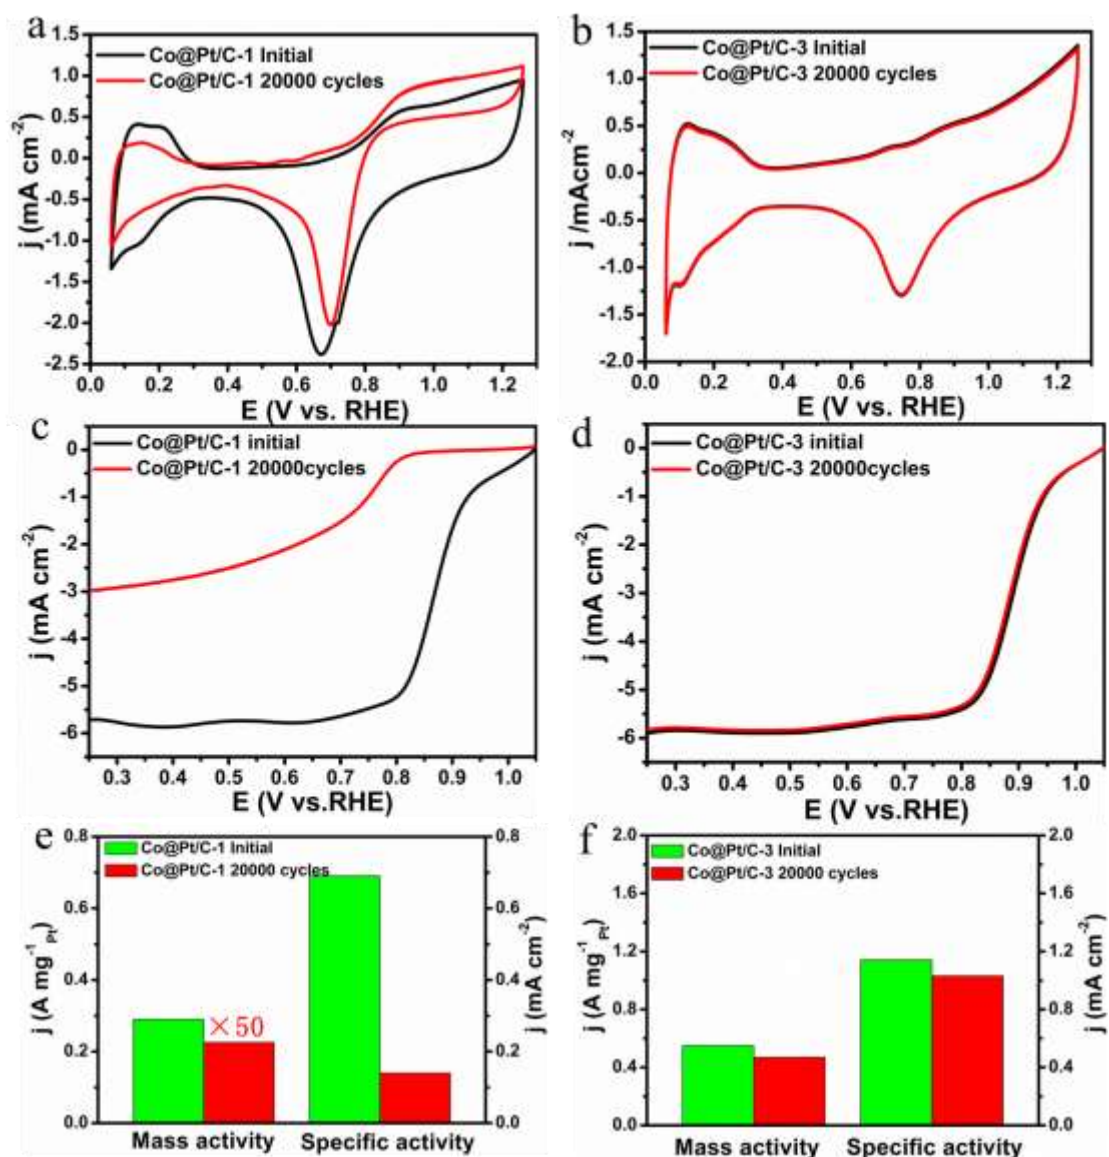

**Figure S5.** CV and ORR polarization curves of Co@Pt/C-1 (a,b) and Co@Pt/C-3 (c, d) before and after different potential cycles, respectively. (e) and (f) show the changes of mass activities and specific activities of Co@Pt/C-1 and Co@Pt/C-3 before and after different potential cycles, respectively.



**Calculation details:**

The ORR reaction pathways on the Co@Pt/C core-shell catalyst were computed. The dissociative mechanism of O<sub>2</sub> has been detailedly understood by Nørskov et al, and the four electron ORR pathway can be calculated by the following steps.<sup>10</sup>

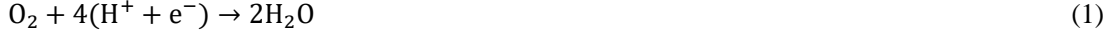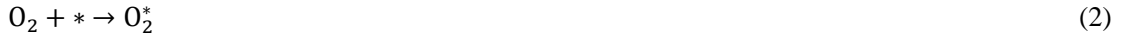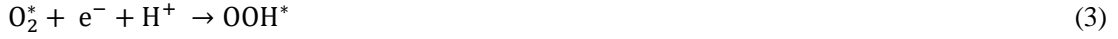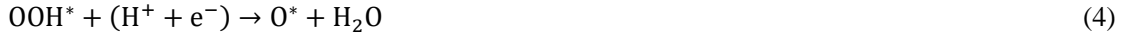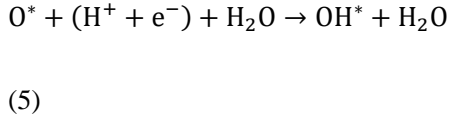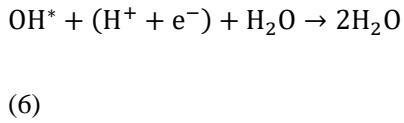

Where, the formula (1) is the total reaction of oxygen reduction, and formulae (2)-(6) are the elementary steps of oxygen reduction reaction.

The Gibbs free energy change for steps 3-6 can be calculated by following schemes.

$$\Delta G_1 = \Delta G(\text{OOH}) - \Delta G(\text{O}_2) + \text{eU} + \Delta G_{PH}$$

$$\Delta G_2 = \Delta G(O) - \Delta G(OOH) + eU + \Delta G_{PH}$$

$$\Delta G_3 = \Delta G(OH) - \Delta G(O) + eU + \Delta G_{PH}$$

$$\Delta G_4 = 0 - \Delta G(OH) + eU + \Delta G_{PH}$$

Where U was the potential of normal hydrogen electrode (NHE) at the standard conditions (T = 298.15 K, P = 1 bar, pH = 0). Here the  $\Delta G(O_2)$  was set as 4.92 eV, which is difficult to calculate accurately by GGA-DFT.<sup>11</sup> The Gibbs free energies of OOH, O and OH were determined by the equation:  $\Delta G = \Delta E + \Delta ZPE - T\Delta S$ .

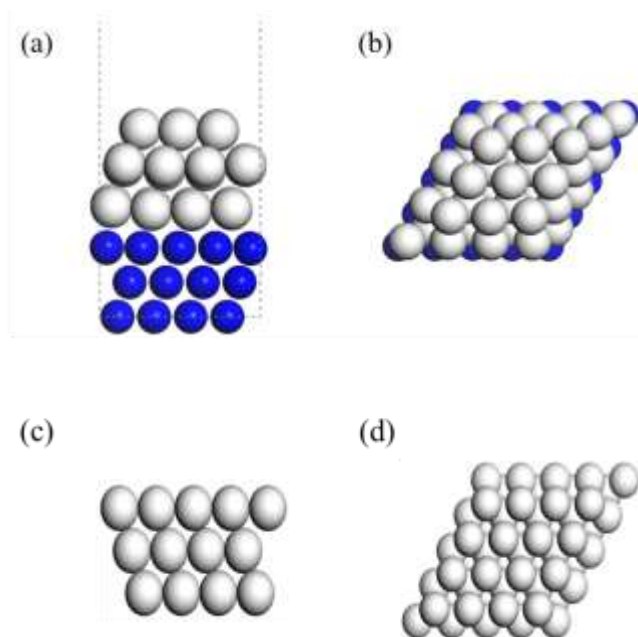

**Figure S6.** In the structures of Co@Pt/C core-shell structure and pure Pt, the white and blue balls are Pt atoms and Co atoms, respectively. (a) and (b) are the side view and top view of Co@Pt/C core-shell structure. (c) and (d) are the side view and top view of pure Pt.

**Reference:**

1. L. Wang, Z. Tang, W. Yan, Q. Wang, H. Yang and S. Chen, *J. Power Sources*, 2017, **343**, 458-466.
2. J.-H. Jang, J. Kim, Y.-H. Lee, I. Y. Kim, M.-H. Park, C.-W. Yang, S.-J. Hwang and Y.-U. Kwon, *Energy Environ. Sci.*, 2011, **4**, 4947.
3. S. M. Alia, S. Pylypenko, K. C. Neyerlin, D. A. Cullen, S. S. Kocha and B. S. Pivovar, *ACS Catal.*, 2014, **4**, 2680-2686.
4. R. Lin, C. Cao, T. Zhao, Z. Huang, B. Li, A. Wieckowski and J. Ma, *J. Power Sources*, 2013, **223**, 190-198.
5. D. A. Cantane, F. E. R. Oliveira, S. F. Santos and F. H. B. Lima, *Appl. Catal., B*, 2013, **136-137**, 351-360.
6. B. P. Vinayan and S. Ramaprabhu, *Nanoscale*, 2013, **5**, 5109-5118.
7. Y. Qin, X. Zhang, X. Dai, H. Sun, Y. Yang, X. Li, Q. Shi, D. Gao, H. Wang, N. F. Yu and S. G. Sun, *Small*, 2016, **12**, 524-533.
8. D. C. Higgins, R. Wang, M. A. Hoque, P. Zamani, S. Aburedden and Z. Chen, *Nano Energy*, 2014, **10**, 135-143.
9. Y. Yu, H. L. Xin, R. Hovden, D. Wang, E. D. Rus, J. A. Mundy, D. A. Muller and H. D. Abruna, *Nano Lett.*, 2012, **12**, 4417-4423.
10. J. K. Nørskov, J. Rossmeisl, A. Logadottir, L. Lindqvist, J. R. Kitchin, T. Bligaard and H. Jónsson, *J. Phys. Chem. B*, 2004, **108**, 17886-17892.
11. M. Bajdich, M. Garcia-Mota, A. Vojvodic, J. K. Nørskov and A. T. Bell, *J. Am. Chem. Soc.*, 2013, **135**, 13521-13530.
